# Supplementary material
Source: MDPI journal article supplement (https://www.mdpi.com/2221-3759/6/2/9)
Supplement: s1 [file s1]

## Supplemental Material

Giuliana D. Clemente, Matthew R. Hannaford, Hamze Beati, Katja Kapp, Jens Januschke, Eric R. Griffis and H.-Arno J. Müller: 'Requirement of the Dynein-adaptor Spindly for mitotic and post-mitotic functions in *Drosophila*'

**Suppl. Fig. 1: Western blot analyses of protein lysates of wild-type (wt) and *spindly*[*mat67*>RNAi (RNAi) embryos.** Females were raised and crossed to homozygous *UAS::Spindly<sup>RNAi</sup>* males at indicated temperatures and 0-3 hours old embryos were collected at 25°C, 21°C and 18°C. RNAi-dependent depletion of anti-Spindly immuno-reactive bands was observed at all temperatures. When using the *mat67::Gal4* driver we did not observe a stringent correlation between the efficacy of RNAi using this driver at different temperatures, probably due to a variable, severe abnormality of early cleavage stages. The intensity of the 100 kDa immuno-reactive band also varied between experiments, probably due to variations in the stability of this presumed degradation product only seen in embryo lysates (anti-tubulin or anti-actin were used as loading control; Mw - Molecular weight (in kDa)).

**Suppl. Fig. 2: Expression of *mat67*>GFP-Spindly in *spindly mat67*>RNAi ovaries.** Confocal optical sections through ovarioles expressing full length GFP-Spindly in RNAi knock down background, which were fixed and stained for GFP (green), f-actin (red) and DNA (DAPI, blue). **(A)** distal part of ovariole with germarium (ge) and egg chambers (ec); note that GFP::Spindly is not expressed in the germarium, but strongly expressed in the early egg chambers. **(B)** stage 9 egg chamber; note the accumulation of GFP::Spindly in the posterior pole of the oocyte (ooc). Scale bar: 20 µm.

### Movie1

Isolated neuroblast overexpressing *UAS>>GFP::Spindly* (red) and *UAS>>mCherry::tubulin* (cyan) under the control of *worniu>Gal4*. Corresponds to figure 1B. GFP::Spindly is recruited to the kinetochore shortly after NEB. At anaphase GFP::Spindly moves away from the metaphase plate towards the spindle pole. GFP::spindly remains at the spindle pole until mitosis is complete whereupon it delocalizes into the cytoplasm. Time stamp: hh:mm. Scale bar: 10 µm.

### Movie2

Isolated neuroblast overexpressing *UAS>>GFP::Spindly<sup>ΔCt</sup>* (red) and *UAS>>mCherry::tubulin* (cyan) under the control of *worniu>Gal4*. GFP::Spindly<sup>ΔCt</sup> is never recruited to the kinetochore throughout mitosis and remains in the cytoplasm. Corresponds to Figure 1C. Time stamp: hh:mm. Scale bar: 10 µm.

### Movie3

Isolated neuroblast overexpressing *UAS>>GFP::Spindly<sup>ΔSB</sup>* (red) and *UAS>>mCherry::tubulin* (cyan) under the control of *worniu>Gal4*. GFP::Spindly<sup>ΔSB</sup> localises similarly to the wild type: it is recruited to the kinetochore following NEB before stripping away from the metaphase plate

towards the spindle pole where it remains until after mitosis. Corresponds to Figure 1D. Time stamp: hh:mm. Scale bar: 10µm.

#### **Movie4**

Isolated neuroblast overexpressing UAS>>GFP::Spindly<sup>ΔNt</sup> (red) and UAS>>mCherry::tubulin (cyan) under the control of *worniu*>Gal4. GFP::Spindly<sup>ΔNt</sup> forms cytoplasmic puncta throughout interphase. In mitosis it is recruited to the kinetochore exhibiting dynamics similar to wild type, moving towards the spindle pole at anaphase. GFP::Spindly<sup>ΔNt</sup> returns to cytoplasmic puncta following mitosis. Corresponds to Figure 1E. Time stamp: hh:mm. Scale bar: 10 µm.

#### **Movie5**

Isolated neuroblast overexpressing UAS>>GFP::Spindly<sup>S34A</sup> (red) and UAS>>mCherry::tubulin (cyan) under the control of *worniu*>Gal4. GFP::Spindly<sup>ΔS234A</sup> localises similarly to the wild type GFP::Spindly as well as GFP::Spindly<sup>ΔSB</sup> localising to the kinetochore after NEB and moving towards the spindle pole upon anaphase onset where it remains until mitosis is complete. Corresponds to Figure 1F. Time stamp: hh:mm. Scale bar: 10µm.

#### **Movie6**

Syncytial cleavage division 12 and 13 of an embryo expressing full length GFP::Spindly in *spindly*[mat67>RNAi] background. GFP fluorescence was imaged and single frames were taken at 20 sec intervals and processed with airy scan on a Zeiss LSM 880 confocal microscope. Scale bar: 5 µm.

#### **Movie7**

Syncytial cleavage division 12 and 13 of an embryo expressing GFP::Spindly[ΔC-term] in *spindly*[mat67>RNAi] background. GFP fluorescence was imaged and single frames were taken at 20 sec intervals and processed with airy scan on a Zeiss LSM 880 confocal microscope. Scale bar: 5 µm.
